# Supplementary material
Source: PubMed Central journal article supplement (PMC3292689)
Supplement: NIHMS355492-supplement-1_si_001.pdf [file NIHMS355492-supplement-1_si_001.pdf]

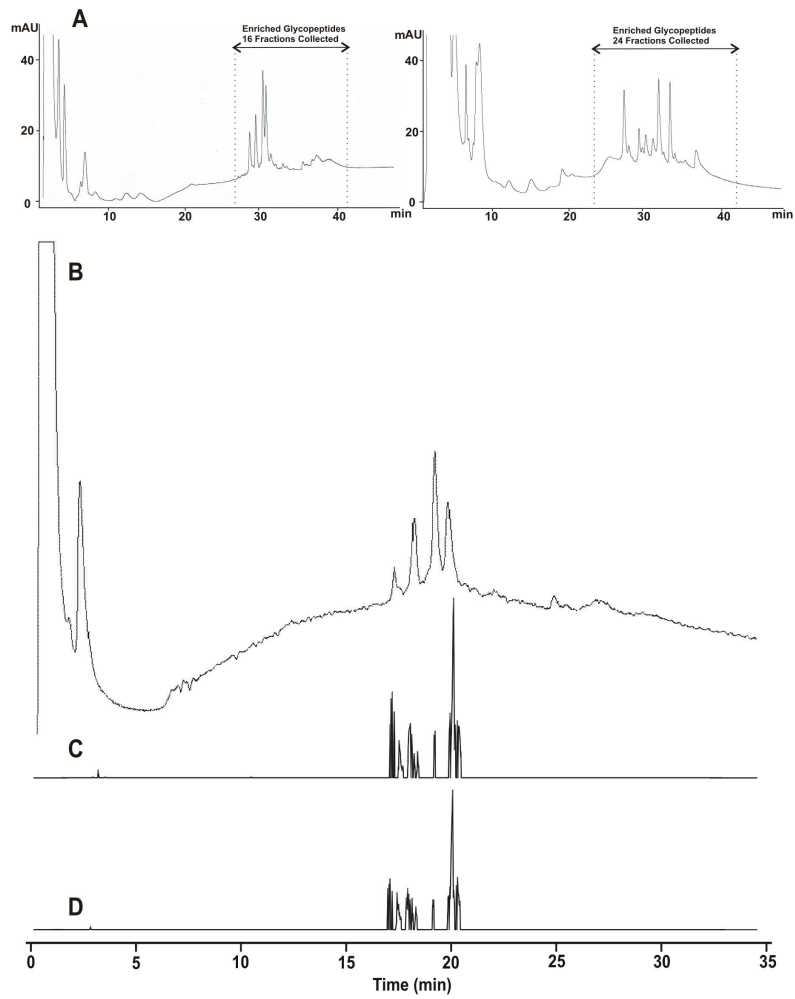

Supplemental figure 1. A) UV traces of tryptic-GluC digest of haptoglobin and tryptic digest of hemopexin separated on a HILIC column. Alignment of the UV trace (chromatogram B) with two extracted ion chromatograms of the data dependent scan of oxonium ions at  $m/z$  204.0 (chromatogram C) corresponding to N-acetylhexosamine and at  $m/z$  366.1 (chromatogram D) corresponding to N-acetylhexosamine-hexose confirm the (glyco)peptide enrichment and separation.
